# Supplementary figures and images for: Zinc Sulfate Stimulates Osteogenic Phenotypes in Periosteum-Derived Cells and Co-Cultures of Periosteum-Derived Cells and THP-1 Cells
Source: MDPI journal article supplement (doi:10.3390/life11050410), 2021-04-30

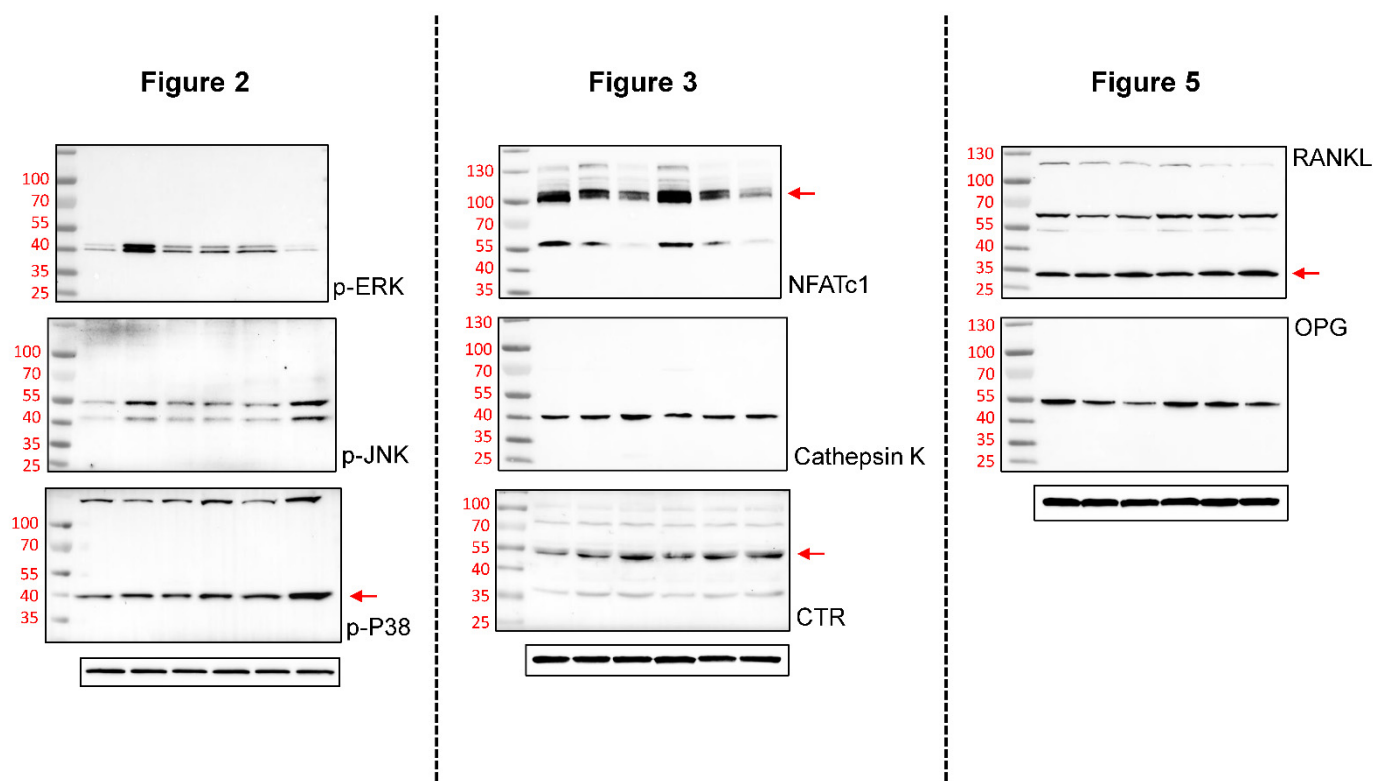

Figure S1. Original Western Blot Figure.

Supplement: s1 [file s1]
